CORRECTION

## Correction: The specious art of single-cell genomics

The *PLOS Computational Biology* Staff

### Notice of Republication

This article was republished on October 23, 2025, to correct errors in the Data Availability statement and Accessible Data link that were introduced during the typesetting process. The publisher apologizes for the errors. Please download this article again to view the correct version. The originally published, uncorrected article and the republished, corrected articles are provided here for reference.

### Supporting information

**S1 File. Originally published, uncorrected article.**

(PDF)

**S2 File. Republished, corrected article.**

(PDF)

### Reference

1. Chari T, Pachter L. The specious art of single-cell genomics. *PLoS Comput Biol*. 2023;19(8):e1011288. <https://doi.org/10.1371/journal.pcbi.1011288> PMID: [37590228](https://pubmed.ncbi.nlm.nih.gov/37590228/)

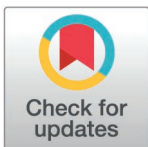

### OPEN ACCESS

**Citation:** The *PLOS Computational Biology* Staff (2025) Correction: The specious art of single-cell genomics. *PLoS Comput Biol* 21(11): e1013655. <https://doi.org/10.1371/journal.pcbi.1013655>

**Published:** November 4, 2025

**Copyright:** © 2025 The *PLOS Computational Biology* Staff. This is an open access article distributed under the terms of the [Creative Commons Attribution License](https://creativecommons.org/licenses/by/4.0/), which permits unrestricted use, distribution, and reproduction in any medium, provided the original author and source are credited.
